# Supplementary material for: An infrared measurement of chemical desorption from interstellar ice analogues
Source: Springer Nature journal article supplement (doi:10.1038/s41550-018-0380-9), 2018-02-02
Supplement: 41550_2018_380_MOESM1_ESM.pdf [file 41550_2018_380_MOESM1_ESM.pdf]

In the format provided by the authors and unedited.

# An infrared measurement of chemical desorption from interstellar ice analogues

Y. Oba <sup>1\*</sup>, T. Tomaru<sup>1</sup>, T. Lamberts <sup>2</sup>, A. Kouchi<sup>1</sup> and N. Watanabe<sup>1</sup>

---

<sup>1</sup>Institute of Low Temperature Science, Hokkaido University, Sapporo, Hokkaido, Japan. <sup>2</sup>Institute for Theoretical Chemistry, University of Stuttgart, Stuttgart, Germany. \*e-mail: [oba@lowtem.hokudai.ac.jp](mailto:oba@lowtem.hokudai.ac.jp)

# **An infrared measurement of chemical desorption from interstellar ice analogues**

Yasuhiro Oba, Takuto Tomaru, Thanja Lamberts, Akira Kouchi & Naoki Watanabe

Contents:

- Supplementary Figure 1. Variations in the relative abundance of H<sub>2</sub>S after exposure to H atoms on ASW (black solid squares) and on crystalline H<sub>2</sub>O ice (red open circles).
- Supplementary Figure 2. Temperature-programmed desorption spectra of H<sub>2</sub>S after exposure to D atoms at m/z = (a) 34, (b) 35 and (c) 36 for 0 (black), 5 (red) and 120 min (blue).
- Supplementary Figure 3. Variations in the relative abundance of solid D<sub>2</sub>S after exposure to D atoms on amorphous D<sub>2</sub>O ice for 120 min (blue solid triangles).
- Supplementary Table 1. HS-(H<sub>2</sub>O)<sub>7</sub> and H<sub>2</sub>S-(H<sub>2</sub>O)<sub>7</sub> structures and corresponding binding energies.

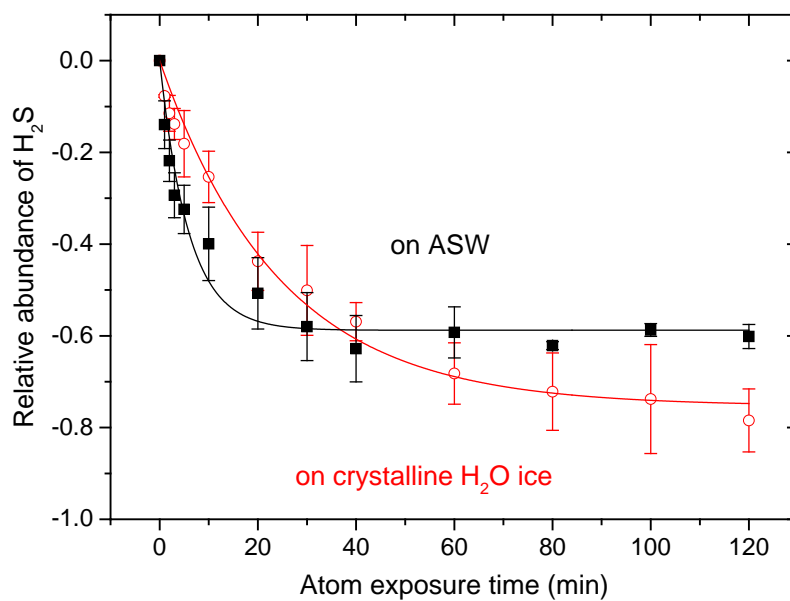

Supplementary Figure 1. **Variations in the relative abundance of H<sub>2</sub>S after exposure to H atoms on ASW (black solid squares) and on crystalline H<sub>2</sub>O ice (red open circles).** The desorption fraction is larger for the reaction on crystalline ice (~80% of the initial H<sub>2</sub>S) than on ASW (~60%). Solid lines are guides for the eyes. Each data point is an average of three measurements with the standard deviation of the mean value.

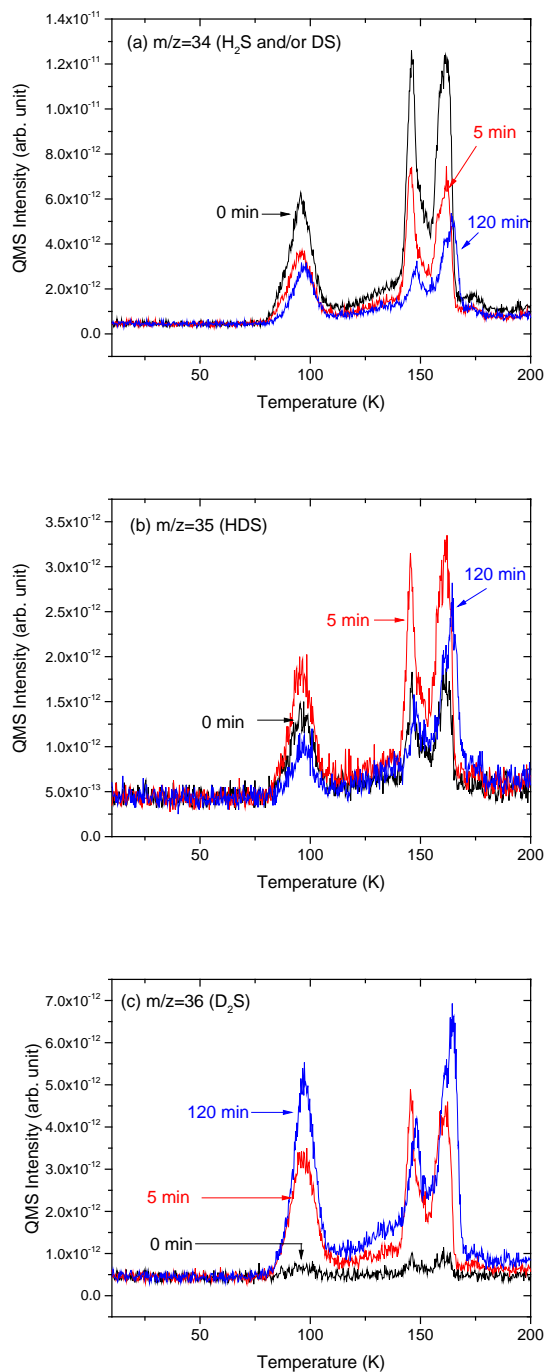

Supplementary Figure 2. **Temperature-programmed desorption (TPD) spectra of  $\text{H}_2\text{S}$  after exposure to D atoms at  $m/z =$  (a) 34, (b) 35 and (c) 36 for 0 (black), 5 (red) and 120 min (blue).** The mass peaks at  $m/z = 34$  include contributions from either or both  $\text{H}_2\text{S}$  and  $\text{DS}$ . The  $\text{DS}$  radical originates from the fragment ions of  $\text{HDS}$  and  $\text{D}_2\text{S}$ . The TPD results in panel (b) clearly indicate the formation of  $\text{HDS}$  at the earlier stages of the  $\text{H}_2\text{S}+\text{D}$  experiment, followed by the formation of  $\text{D}_2\text{S}$  as shown in

panel (c). This trend is consistent with our proposal that the reaction between  $\text{H}_2\text{S} + \text{D}$  proceeds through reactions R3–R6 and hence the reaction between  $\text{H}_2\text{S} + \text{H}$  proceeds through reactions R1 and R2. Detection of  $\text{HDS}$  ( $m/z = 35$ ) and  $\text{D}_2\text{S}$  ( $m/z = 36$ ) in the non-processed sample (0 min) would not be due to the presence of both deuterated sulfides but be mainly due to the low mass resolution of the present QMS setup.

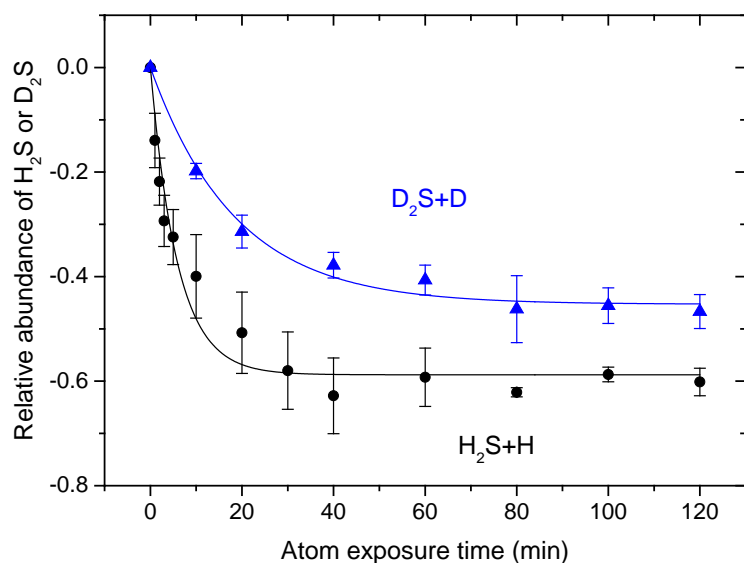

Supplementary Figure 3. **Variations in the relative abundance of solid  $\text{D}_2\text{S}$  after exposure to D atoms on amorphous  $\text{D}_2\text{O}$  ice for 120 min (blue solid triangles). Those of solid  $\text{H}_2\text{S}$  after exposure to H atoms (black solid squares) are also shown for comparison.** The solid lines are guides for the eyes. Each data point is an average of three measurements with the standard deviation of the mean value.

Supplementary Table 1. HS-(H<sub>2</sub>O)<sub>7</sub> and H<sub>2</sub>S-(H<sub>2</sub>O)<sub>7</sub> structures and corresponding binding energies with respect to the separated cluster and adsorbate. The blue dashed lines are a guide to the eye.

| Structure                                                                           | Binding Energy (kJ/mol) | Zero-point energy (kJ/mol) | Total (kJ/mol) |
|-------------------------------------------------------------------------------------|-------------------------|----------------------------|----------------|
| 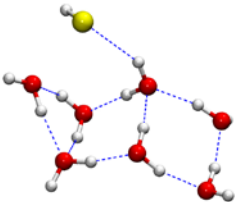   | -16.8                   | 4.7                        | -12.1          |
|   | -23.3                   | 7.2                        | -16.1          |
|  | -12.8                   | 4.0                        | -8.8           |
|  | -13.3                   | 6.7                        | -6.6           |
